# Supplementary material for: Evaluation of a multiplex PCR method for the detection of porcine parvovirus types 1 through 7 using various field samples
Source: PubMed Central journal article supplement (PMC7842984; doi:10.1371/journal.pone.0245699), 2021-01-28

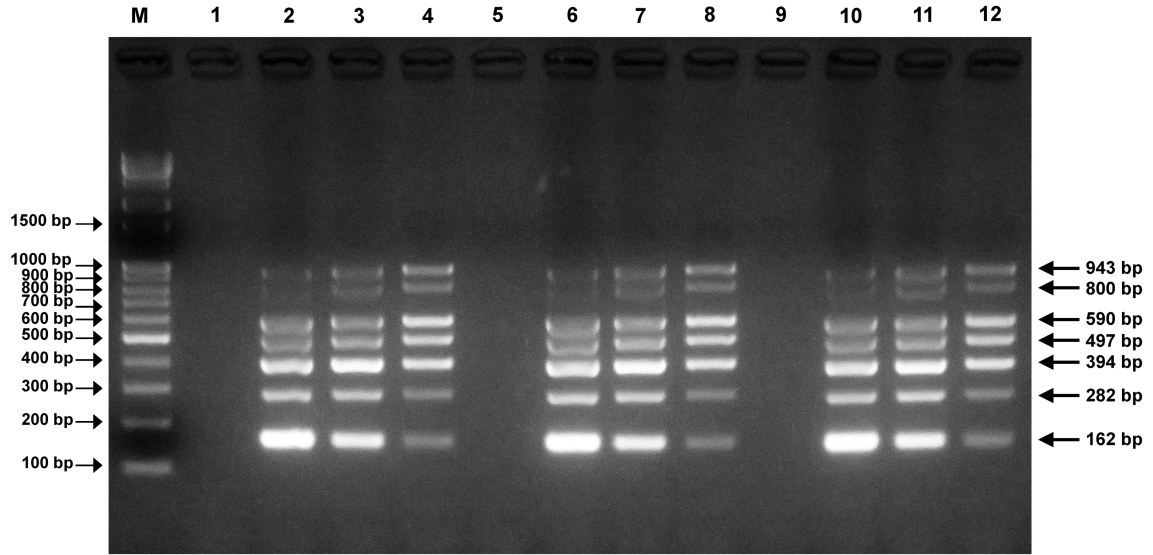

Supplement: pone.0245699.s001.pdf [file pone.0245699.s001.pdf]
